# Supplementary material
Source: PubMed Central journal article supplement (PMC5844465)
Supplement: NIHMS76161-supplement-Supplemental_Material.pdf [file NIHMS76161-supplement-Supplemental_Material.pdf]

The IPRAVE consortium included the following institutions and people:

**Institution**

*Principal Investigators*

Biomathematics and Statistics Scotland

Emory University

Health Protection Agency

Imperial College

Scottish Agricultural College

University of Edinburgh

University of Glasgow

University of Guelph

*Other Collaborators*

Centre for Disease Control and Prevention, Atlanta

Health Protection Scotland

Institute of Microbiology and Animal Epidemic Diseases, Berlin

Scottish *E. coli* O157 Reference Laboratory

Stobhill NHS Trust

University of Birmingham

**Members name**

Lesley Allison

Sebastian Amyes,

Derek Brown

Henrik Chart

Margo Chase-Topping,

John Coia

Fiona Cooke

Helen Davison,

Gordon Dougan

Giles Edwards

Judith Evans

Geoff Foster

Gad Frankel

Kimberley Garner  
George Gunn  
Jo Halliday,  
Ahmed Hamouda,  
Mary Hanson  
Kristen Harper  
Deborah Hoyle  
Giles Innocent  
Margi Lee  
Bruce Levin  
Wei-chung Liu  
Mary Locking  
Chris Low  
Hazel Knight  
Stuart Knutton  
Claire Jenkins  
Alison Mather  
Louise Matthews  
Scott McEwen  
Iain McKendrick  
Dominic Mellor  
Michael Pearce  
David Pearl  
Liljana Petrovska  
Derek Pickard  
Stuart Reid  
Bill Reilly  
Mary Reynolds  
Jill Sales  
Darren Shaw  
Alastair Smith  
Henry Smith  
Kate Snedeker

Barti Synge

Robert Tauxe

Helen Ternent

Nils Toft

Leila Vali

Lothar Wieler

Camilla Wiuff

Joanna Wood

Mark Woolhouse

Catherine Yates

Renata Zappala
